# Supplementary material for: A europium-based fluorescence probe for detection of thiols in urine
Source: Royal Society of Chemistry journal article supplement (doi:10.1039/c4ay01187b), 2014-01-01
Supplement: c4ay01187b1.pdf [file c4ay01187b1.pdf]

## Supporting Information

### A europium-based fluorescence probe for detection of thiols in urine

Feng Xie <sup>1,2</sup>, Hong Tan <sup>1,2\*</sup>, Zhanbin Li <sup>2</sup>, Hongbo Yang <sup>2</sup>

1. College of Science, Beijing University of Chemical Technology, Beijing 100029, China.

2. Guizhou Academy of Testing and Analysis, Guiyang 550002, China.

\*Corresponding author: E-mail: [tanhong@gzata.cn](mailto:tanhong@gzata.cn); Tel: +86 851 5891877

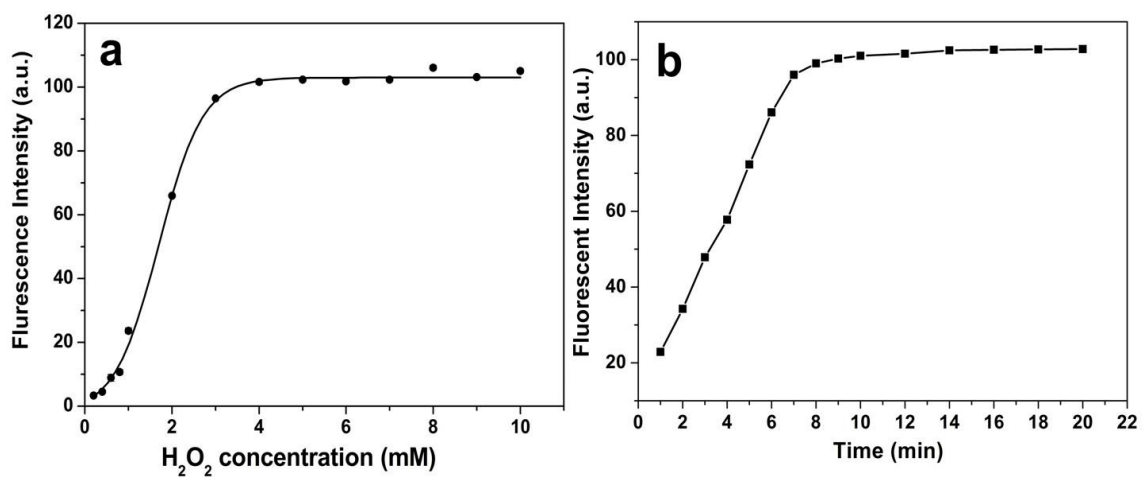

Figure S1. Effect of H<sub>2</sub>O<sub>2</sub> concentration (a) and reaction times (b) on the fluorescent intensity of EuTc at 615 nm.

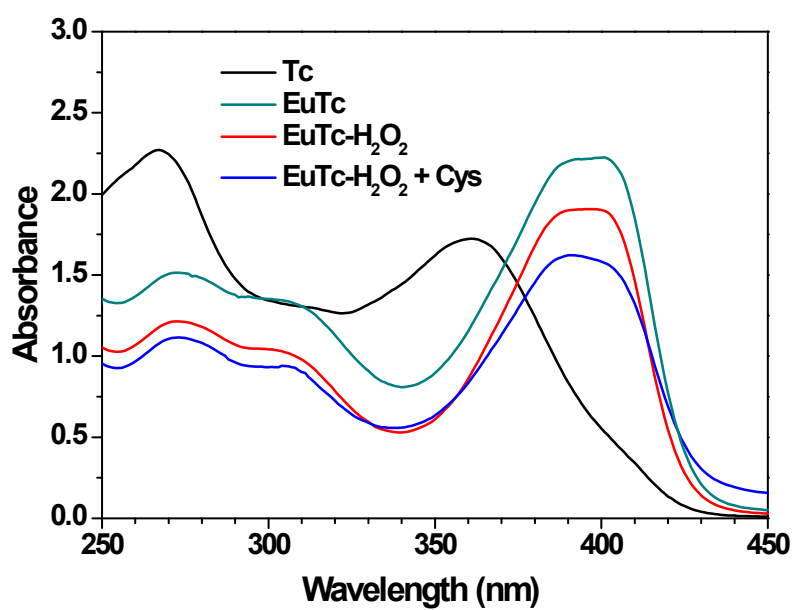

Figure S2. Absorption spectra of Tc (a), EuTc (b), and EuTc-H<sub>2</sub>O<sub>2</sub> in the absence (c) and presence (d) of Cys.

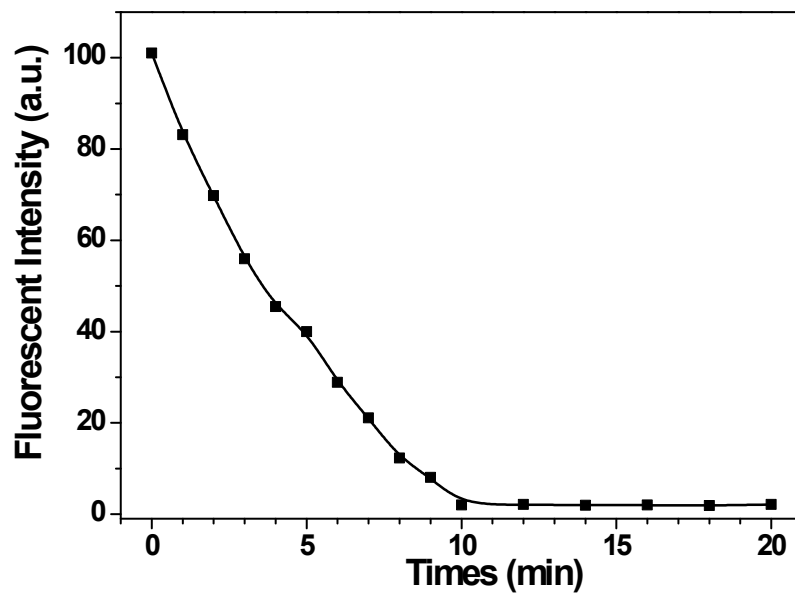

Figure S3. The changes of EuTc-H<sub>2</sub>O<sub>2</sub> complex in the presence of Cys at different times.

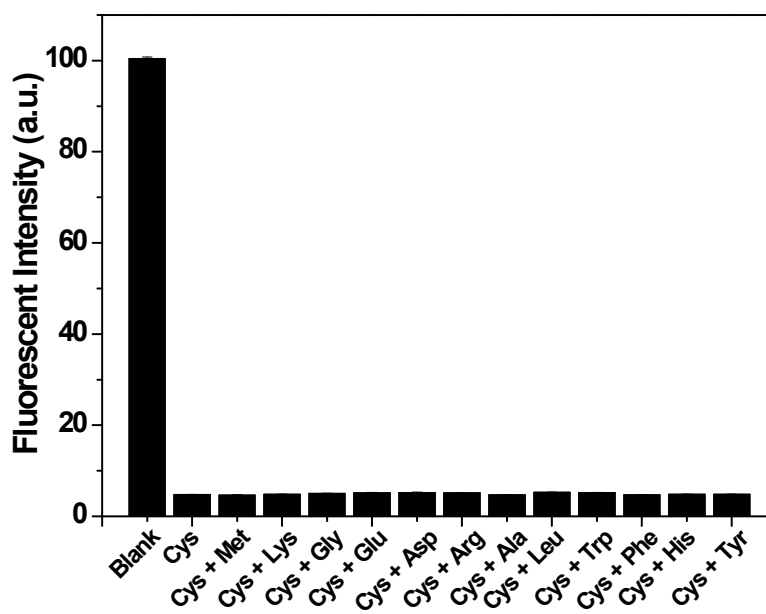

Figure S4. Fluorescent intensities of EuTc-H<sub>2</sub>O<sub>2</sub> complex in the presence of Cys with various amino acids.

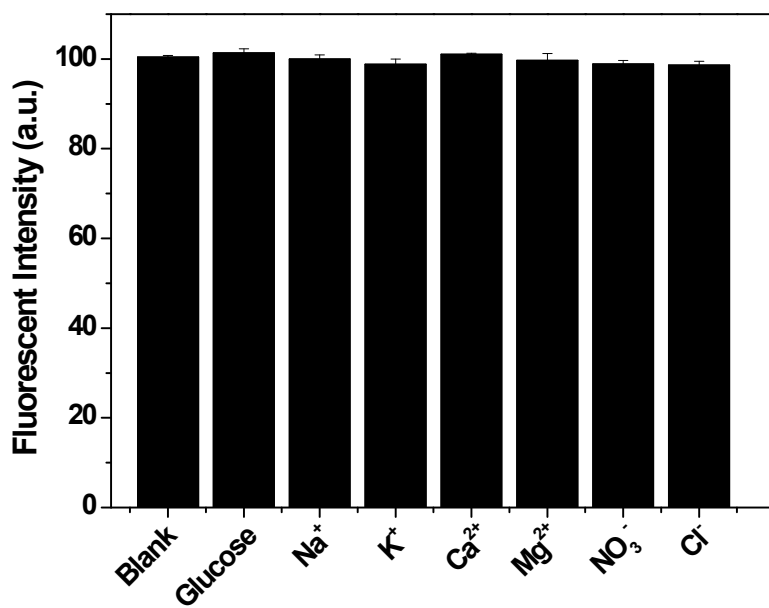

Figure S5. Fluorescent intensities of EuTc-H<sub>2</sub>O<sub>2</sub> complex in the presence of foreign substances in urine samples (each 20 μM)
